# Supplementary material
Source: HighWire-hosted journal article supplement (https://erj.ersjournals.com/content/54/3/1900362)
Supplement: inline-supplementary-material-2 [file inline-supplementary-material-2.pdf]

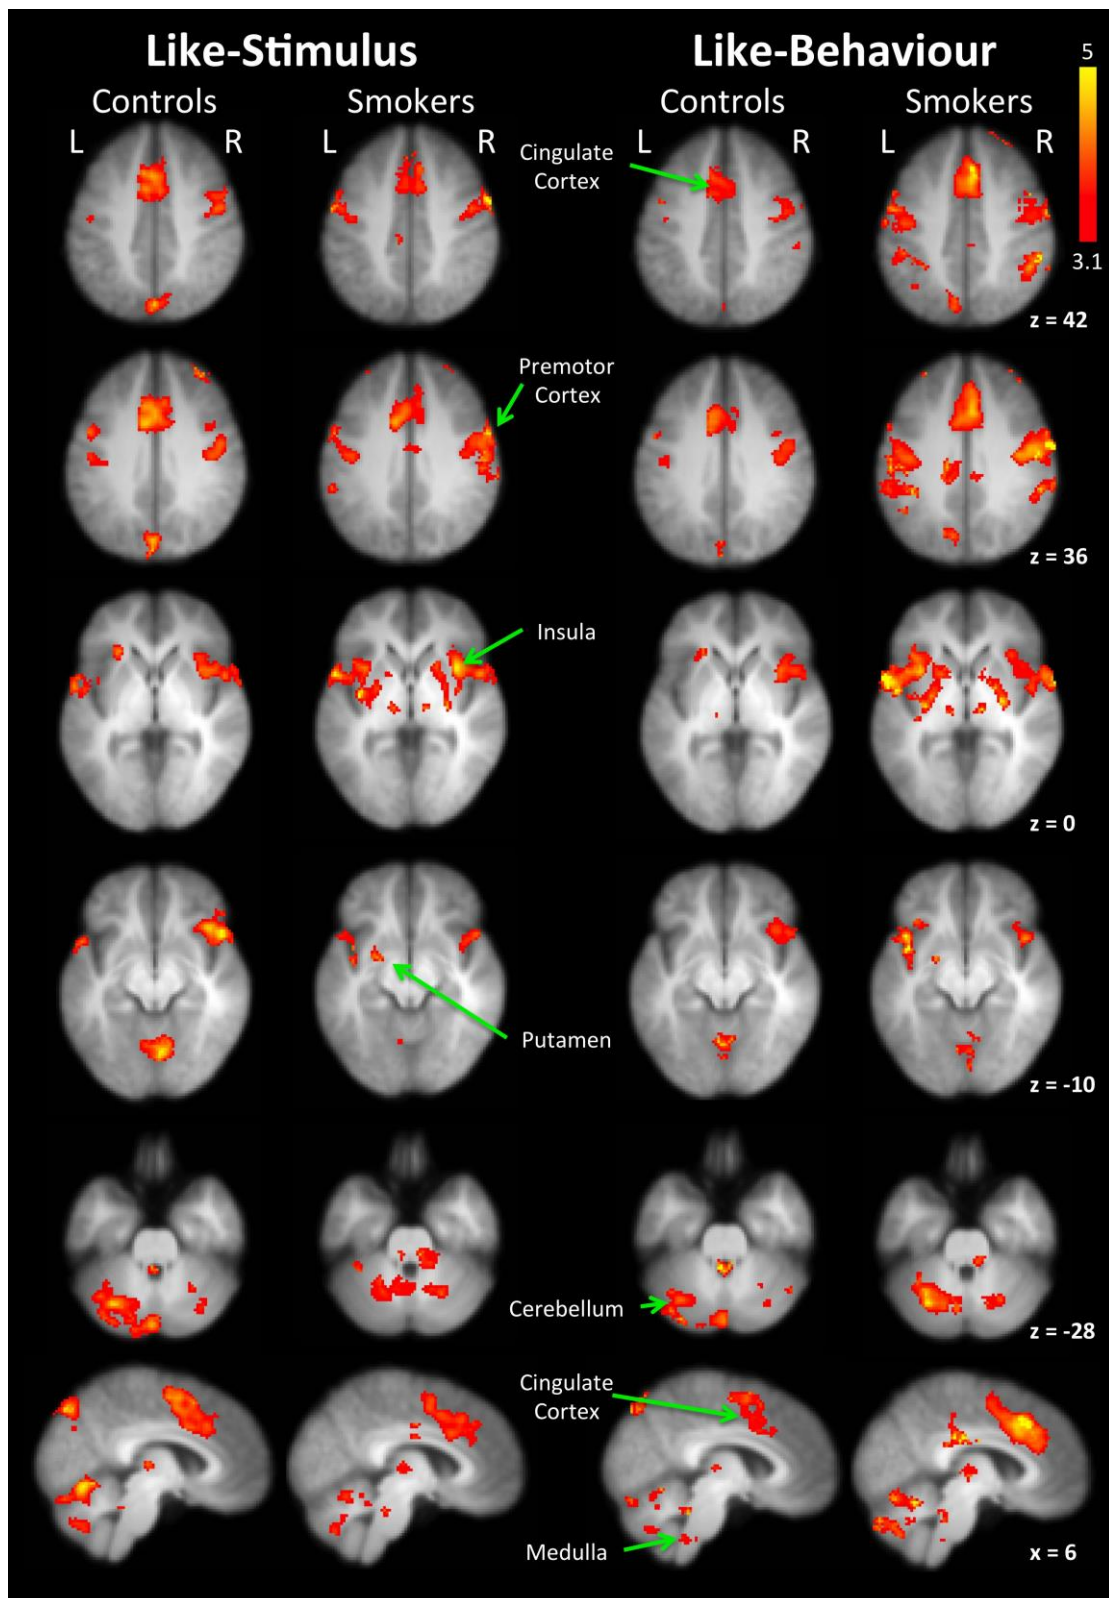

**Supplementary Figure S1: Capsaicin-induced brain activation for non-smoker controls and smokers during matched capsaicin dose inhalation challenges (Like-stimulus) and  $S_{max}$  inhalation challenges (Like-behaviour).** Group capsaicin-inhalation activations were generated for non-smoking controls and smokers. The concentrations of capsaicin inhaled by each participant was tailored to their sensitivity or matched to their pair. *Abbreviations:* Supplementary motor area (SMA); sensorimotor cortex (S1/M1). All axial brain images are presented in the neurological convention (left side of the page is the left hemisphere of the brain).
